# Supplementary material for: HDAC inhibitor sodium butyrate prevents allergic rhinitis and alters lncRNA and mRNA expression profiles in the nasal mucosa of mice
Source: PubMed Central journal article supplement — Int J Mol Med. 2020 Feb 5;45(4):1150–62. doi: 10.3892/ijmm.2020.4489 (PMC7053856; doi:10.3892/ijmm.2020.4489), 2020-02-05
Supplement: Supplementary_Data.pdf [file Supplementary_Data.pdf]

Table SI. PCR primer sequence of mRNAs and lncRNAs.

| A, lncRNA          |                                                        |          |               |
|--------------------|--------------------------------------------------------|----------|---------------|
| Gene               | Primer sequence 5'→3'                                  | Amplicon |               |
| GAPDH              | F: GAGATTACTGCTCTGGCTCCTA<br>R: GGACTCATCGTACTCCTGCTTG | 182      |               |
| NONMMUT016103      | F: CACTCCAGACCCTTTCC<br>R: GTAATAGATGCCCCGTGT          | 93       |               |
| NONMMUT057309      | F: TCTCCATCCTCCCTGTC<br>R: ACTGCCACTGAACCTTG           | 177      |               |
| B, mRNA            |                                                        |          |               |
| Gene               | Primer sequence 5'→3'                                  | Amplicon | ProbeID       |
| GAPDH              | F: GAGATTACTGCTCTGGCTCCTA<br>R: GGACTCATCGTACTCCTGCTTG | 182      |               |
| ENSMUST00000103403 | F: CCAACAGAAACCAGGACA<br>R: CCCACTGCCACTAAACC          | 91       | A_65_P07626   |
| ENSMUST00000103401 | F: CAACAGAAACCAGGACA<br>R: ACCCACTGCCACTAAA            | 91       | A_52_P502849  |
| ENSMUST00000103366 | F: CTCCAAGGCTTCTCATC<br>R: CCCTCCGAACGTGTAA            | 173      | A_66_P103232  |
| ENSMUST00000103443 | F: AGAGCCTGTCCATCACC<br>R: CACTCCAGACCCTTTCC           | 94       | A_55_P2187235 |
